# Supplementary material for: Zinc oxide/nanoporous carbon hybrid materials derived from metal–organic frameworks with different dielectric and absorption performances
Source: Royal Society of Chemistry journal article supplement (doi:10.1039/c9qi00648f), 2019-01-01
Supplement: c9qi00648f1.pdf [file c9qi00648f1.pdf]

Electronic Supplementary Material (ESI) for Inorganic Chemistry Frontiers  
This journal is © The Royal Society of Chemistry 2018

### Electronic Supplementary Material

## **Zinc oxide/nanoporous carbon hybrid materials derived from metal-organic frameworks with different dielectric and absorption performances**

Xiaohui Liang,<sup>†, a, b</sup> Xin Xu,<sup>†, b</sup> Zengming Man,<sup>a</sup> Bin Quan,<sup>a</sup> Bowen, Sun,<sup>b</sup> Jiabin Chen,<sup>a</sup> Weihua Gu,<sup>a</sup> Guangbin Ji<sup>a,\*</sup>

a College of Material Science and Engineering, Nanjing University of Aeronautics and Astronautics, Nanjing, 210016, P. R. China

b Division of Physics and Applied Physics, School of Physical and Mathematical Sciences, Nanyang Technological University, Singapore 637371.

\* **Corresponding to:** [gbi@nuaa.edu.cn](mailto:gbi@nuaa.edu.cn), College of Material Science and Engineering, Nanjing University of Aeronautics and Astronautics, Nanjing, 210016, P. R. China

<sup>†</sup> These authors contributed equally to this work.

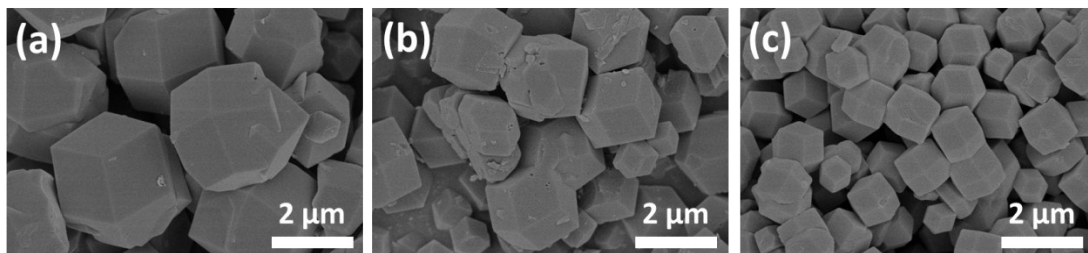

**Fig. S1** a-c) SEM images of S-700/800/900.

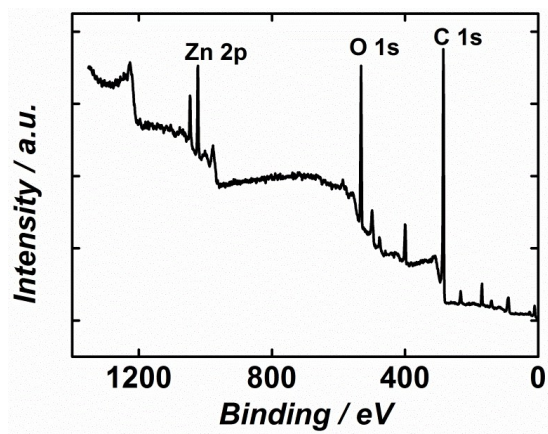

**Fig. S2.** XPS survey spectrum of S-800.

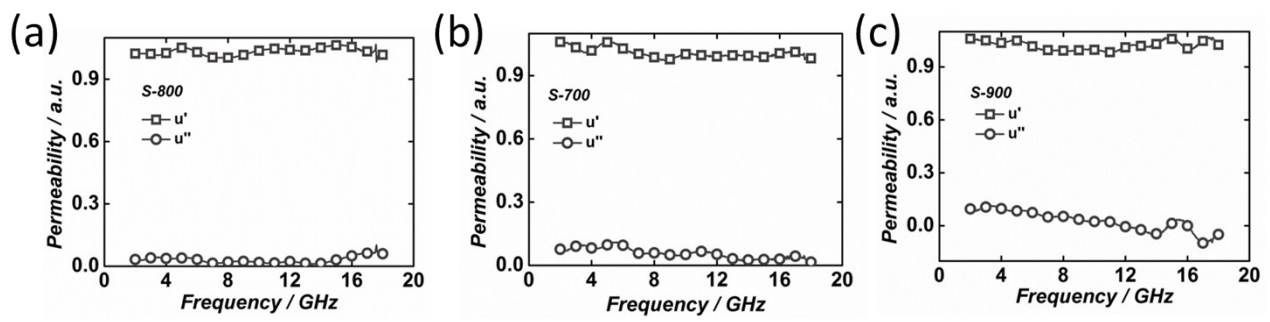

Fig. S3 a-c) Permeability of S-700/800/900.

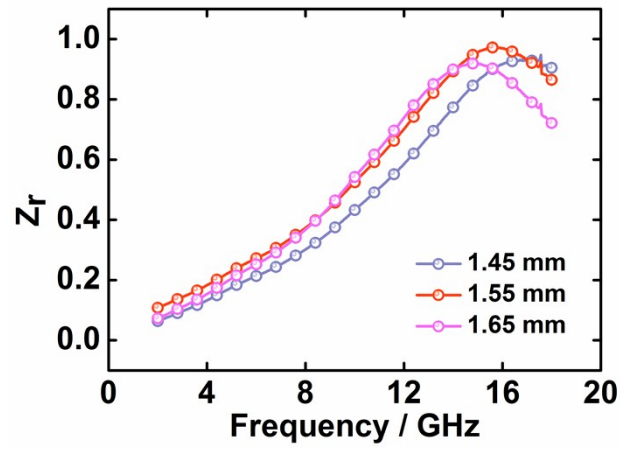

**Fig. S4** Impedance matching characteristics of S-800 composites with different thicknesses.

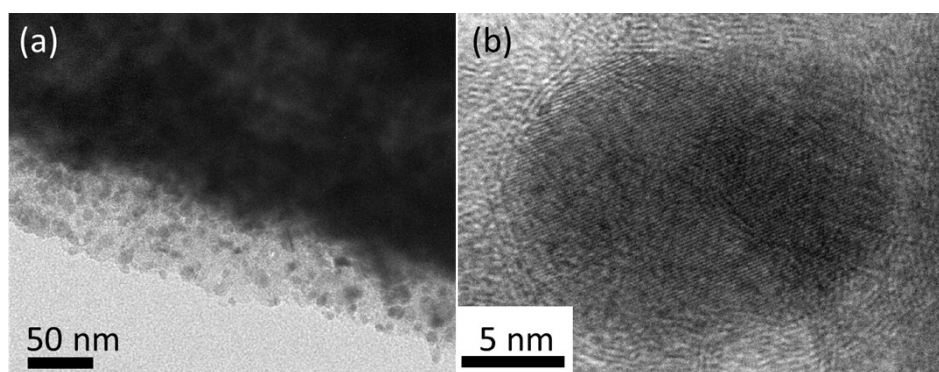

**Fig. S5** TEM and HRTEM images of sample S-800.
